# Supplementary material for: Approaches to radar reflectivity bias correction to improve rainfall estimation in Korea
Source: Copernicus journal article supplement (doi:10.5194/amt-2015-392), 2016-01-18
Supplement: Supplementary file [file amt-2015-392-AC1-supplement.pdf]

# Approaches to radar reflectivity bias correction to improve rainfall estimation in Korea

C.-H. You<sup>1</sup>, M.-Y. Kang<sup>2</sup>, D.-I. Lee<sup>1,2</sup>, and J.-T., Lee<sup>2</sup>

[1] {Atmospheric Environmental Research Institute, Pukyong National University, Busan, South Korea}

[2] {Department of Environmental Atmospheric Sciences, Pukyong National University, Busan, South Korea}

Correspondence to: D.-I. Lee (leedi@pknu.ac.kr)

## Abstract

Three methods for determining the reflectivity bias of single polarization radar using dual polarization radar reflectivity and disdrometer data (i.e., the equidistance line, overlapping area, and disdrometer methods) are proposed and evaluated for two low-pressure rainfall events that occurred over the Korean Peninsula on 25 August 2014 and 8 September 2012. Single polarization radar reflectivity was underestimated by more than 12 dB and 7 dB in the two rain events, respectively. All methods improved the accuracy of rainfall estimation, except for one case where DSDs were not observed, as the precipitation system did not pass through the disdrometer location. The use of these bias correction methods reduced the RMSE by as much as 50%. Overall, the most accurate rainfall estimates were obtained using the overlapping area method to correct radar reflectivity. A combination of all three methods would produce more accurate rainfall estimates, provided optimal values are determined for the domain size for the overlapping area method, the sample number threshold for the equidistance line method, and the reflectivity threshold for the disdrometer method.

## 1 Introduction

Radar is a useful remote sensing instrument for measuring rainfall amount, due to its relatively high resolution in both space and time. Rainfall rate is not measured directly, but must be derived from radar reflectivity. This derivation of radar rainfall is based on the relationship

1 between reflectivity ( $Z$ ) and rainfall rate ( $R$ ), known as the  $Z$ – $R$  relation ( $R(Z)$ ). Experimentally  
2 measured drop size distributions (DSDs) have been used extensively to obtain both radar  
3 reflectivity and rainfall rate (Compos and Zawadzki, 2000; Jang et al., 2004; You et al., 2004).  
4 There does not be existed a unique  $R(Z)$ , since DSDs can vary between storms and even within  
5 a single storm (Battan 1973; You et al., 2010).

6 However, radar rainfall estimation is complicated by a number of uncertainties including  
7 hardware calibration, partial beam filling, rain attenuation, brightband, and non-weather echoes  
8 (Wilson and Brandes, 1979; Austin, 1987). The correction of bias in  $Z$  caused by hardware  
9 calibration error is difficult to achieve using single polarimetric radar (SPOL) alone.  
10 Polarimetric radar (DPOL) provides a new method for the absolute calibration of reflectivity,  
11 which has been a longstanding problem with single polarization radar data. The method is based  
12 on the assumptions that  $Z$ , differential reflectivity ( $Z_{DR}$ ), and specific differential phase ( $K_{DP}$ )  
13 are independent of each other, and that  $Z$  can be estimated from  $Z_{DR}$  and  $K_{DP}$ , which are  
14 insensitive to radar miscalibration (Gorgucci et al., 1992, 1999; Goddard et al., 1994; Scarchilli  
15 et al., 1996; Vivekanandan et al., 1999).

16 The Korea Meteorological Administration (KMA) is in the process of replacing Doppler radars  
17 with S-band DPOLs (to be completed by 2019), and Ministry of Land, Infrastructure and  
18 Transport (MoLIT) has installed four S-band DPOLs for operational use since 2009. Until the  
19 DPOL installation is complete, it is necessary to use a combination of SPOLs and DPOLs to  
20 produce rainfall mosaics covering the whole Korean Peninsula. To obtain more accurate  
21 mosaicked radar rainfall, SPOL reflectivity should be corrected using the reflectivity of DPOLs  
22 and other instruments such as disdrometer. Accurate SPOL reflectivity is also required for  
23 climatological analysis using radar rainfall.

24 This paper discusses three methods for reducing errors in SPOL reflectivity using DPOL and  
25 DSD measurements. In Section 2, the dataset used for the analysis is introduced, and three  
26 approaches to correcting SPOL reflectivity are described, along with methods for bias  
27 correction of DPOL reflectivity and  $Z_{DR}$ , and for validation. In Section 3, the results obtained  
28 using the three correction methods are compared with gauge measurements. Finally, we  
29 summarize the results and provide conclusions in Section 4.

30

## 1   2   **Data and methodology**

### 2   **2.1 Gauge, disdrometer, and radar datasets**

3   Rainfall data from rain gauges operated by the KMA were used to evaluate the accuracy of  
4   radar rainfall. Rain gauges located between 5 and 134 km from the radar were included in the  
5   analysis. Figure 1 shows the location of all instruments used in this study. The PARSIVEL  
6   (PARTicle SIZE VELOCITY) disdrometer was installed ~9 km from PSN. PARSIVEL is a laser-  
7   optic system that measures 32 channels from 0.062 to 24.5 mm (for detailed specifications, see  
8   Loffler-Mang and Joss, 2000).

9   Data were regarded as unreliable and removed from the analysis in the case that any of the  
10   following conditions were met: 1 min rain rate was less than 0.1 mm h<sup>-1</sup>; total number  
11   concentration from all channels was less than 10; drop numbers were recorded only in the lower  
12   10 channels (1.187 mm for PARSIVEL); or drop numbers were recorded only in the lower 5  
13   channels (0.562 mm for PARSIVEL) (You et al., 2015).

14   Radar data were recorded at PSN and BSL, which were installed and are operated by KMA and  
15   MoLIT, respectively. The transmitted peak power of BSL is 750 kW, the beam width is 0.95 °,  
16   the frequency is 2.791 GHz, and the antenna is 1085 m above sea level. The polarimetric  
17   variables are estimated with a gate size of 0.125 km. The scan strategy consists of six elevation  
18   angles with a 2.5 min update interval. The transmitted peak power of PSN is 800 kW, the beam  
19   width is 1.0 degrees, and the antenna is 547 m above sea level. The reflectivity is estimated  
20   with a gate size of 0.25 km. The PSN scan strategy consists of 13 elevation angles with a 10  
21   min update interval. Radar variables at an elevation angle of 0.5 (1.8) degrees were extracted  
22   from the BSL (PSN) data every 10 mins, to match the time interval for this study. Non-  
23   meteorological targets were removed from the PSN data using the texture and vertical gradient  
24   of reflectivity, as proposed by Zhang et al. (2004). Polarimetric variables were subjected to  
25   quality control using a threshold of 15 degrees for the standard deviation of the differential  
26   phase shift (You et al., 2014).

27   The quality controlled  $Z_H$ ,  $Z_{DR}$ ,  $K_{DP}$  measured from BSL were used to calibrate  $Z_{DR}$  and  $Z_H$  of  
28   BSL. The  $Z_H$  measured from PSN were then corrected by using calibrated  $Z_H$  of BSL using  
29   self-consistency method and  $Z_H$  measured by PARSIVEL. The gage rainfall data were used to  
30   assess the performance of three  $Z_H$  bias correction methods for PSN which is SPOL.

## 1 2.2 Z and Z<sub>DR</sub> bias correction for BSL

2 Before calculating reflectivity bias for PSN using BSL, reflectivity and Z<sub>DR</sub> must be corrected  
3 for systematic bias. Z<sub>DR</sub> bias correction is important for the absolute calibration of the radar  
4 using a self-consistency method. Gorgucci et al. (1999) proposed using a vertical pointing scan  
5 of light rain, to take advantage of the nearly spherical shape of the raindrops as seen from below.  
6 Ryzhkov et al (2005) used the elevation angle dependency of Z<sub>DR</sub> as an alternative technique  
7 and concluded that the high variability of Z<sub>DR</sub> in rainfall prohibited the method from achieving  
8 the required absolute calibration accuracy of 0.2 dB. They instead proposed a method that  
9 utilizes the structural characteristics of the melting layer in stratiform clouds and the dry  
10 aggregated snow present above the melting layer. Z<sub>DR</sub> measurements from dry aggregated snow  
11 above the melting layer resulted in a mean S-band value of 0.2 dB and an accuracy of 0.1–0.2  
12 dB. Trabal et al. (2009) evaluated two methods using the intrinsic properties of dry aggregated  
13 snow present above the melting layer and light rain measurements close to the ground, and  
14 found that a Z<sub>DR</sub> calibration accuracy of 0.2 dB or better was achieved using either method.

15 Vertical pointing data were not available in the present case, and the scan strategy, with six  
16 elevation angles, was unable to detect the melting layer. Therefore, in this study, light rain  
17 measurements close to the ground were used to calibrate Z<sub>DR</sub>. Light rain was defined using a  
18 threshold of  $20 \text{ dBZ} \leq Z \leq 28 \text{ dBZ}$ , as proposed by Marks et al. (2011). The assumption of Z<sub>DR</sub>  
19 is close to zero in case of the small rain drop like drizzle was chosen for this study. The Z<sub>DR</sub>  
20 observed from BSL having with reflectivity in the range of 20 dBZ to 28 dBZ for given time  
21 period were averaged. Then the averaged Z<sub>DR</sub> was taken as a Z<sub>DR</sub> bias.

22 The Z<sub>H</sub> bias was calculated by self-consistency method using a 9-gate moving average of bias  
23 corrected Z<sub>DR</sub> in the range of 0.2 dB to 3.0 dB to improve the accuracy. This method depends  
24 on the notion that Z<sub>H</sub>, Z<sub>DR</sub>, and K<sub>DP</sub> are independent in rain, and that Z<sub>H</sub> can be estimated from  
25 Z<sub>DR</sub> and K<sub>DP</sub>. The difference between the computed and observed values of Z<sub>H</sub> is referred to as  
26 the Z bias. Following the method of Ryzhkov et al. (2005), the entire spatial and temporal  
27 domain was divided into 1 dB intervals of Z<sub>H</sub> between Z<sub>min</sub> (30 dBZ) and Z<sub>max</sub> (50 dBZ), and  
28 the K<sub>DP</sub>(Z<sub>H</sub>) and Z<sub>DR</sub>(Z<sub>H</sub>) within each interval were calculated. The Z<sub>H</sub> bias is then determined  
29 by matching the integrals:

$$30 \quad I_1 = \sum_{Z_{\min}}^{Z_{\max}} K_{DP}(Z)n(Z)\Delta Z, \quad (1)$$

$$1 \quad I_2 = \sum_{Z_{\min}}^{Z_{\max}} 10^{0.1Z_m} f(Z_{DR}) n(Z) \Delta Z, \quad (2)$$

2 The function of  $f(Z_{DR})$  in Eq. (2) can be well approximated by a fourth-order polynomial fit for  
 3 certain range of  $Z_{DR}$  (Gourley et al., 2009) like Eq. (3).

$$4 \quad f(Z_{DR}) = 10^{-5} (a_0 + a_1 Z_{DR} + a_2 Z_{DR}^2 + a_3 Z_{DR}^3), \quad (3)$$

5 The estimated  $Z_H$  bias is determined from Vivekanandan et al. (2003) by

$$6 \quad Z_H \text{ bias} (dB) = 10 \log \left( \frac{I_2}{I_1} \right), \quad (4)$$

7 If the radar is well calibrated,  $Z_H$  bias should be equal to 0. The coefficients of  $f(Z_{DR})$  were  
 8 calculated by T-matrix scattering method using long period DSD data and are 4.26, -4.67, 2.67,  
 9 and -0.54, respectively.

### 10 **2.3 Methodology for bias correction of PSN reflectivity**

11 To calculate the reflectivity bias of PSN, which is single polarization radar, three approaches  
 12 were used: the equidistance line method, the overlapping area method, and the disdrometer  
 13 method. The first approach is to compare the reflectivities along the line that is equidistant  
 14 between the two radars. To determine this line for the two radars, the effective radius was set  
 15 to 100 km and the distance between the two radars and the azimuthal angle pointing from BSL  
 16 to PSN were calculated using their latitude and longitude values. The start and end azimuthal  
 17 angles for comparison of reflectivity were then calculated as follows:

$$18 \quad AZ_{st} = \beta - a \cos(0.5 \times dr / rc) \quad (1)$$

$$19 \quad AZ_{end} = \beta - a \cos(0.5 \times dr / rc) + 2 \times a \cos(0.5 \times dr / rc), \quad (2)$$

20 where  $AZ_{st}$  and  $AZ_{end}$  are the start and end azimuthal angles for the comparison, respectively;  $\beta$   
 21 is an azimuthal angle which is the angle between north and the bearing from BSL points to  
 22 PSN and  $rc$  and  $dr$  are the effective radius and distance from BSL to PSN, respectively. The  
 23 distance between the two radars is 76.9 km, and the start and end azimuthal angles of BSL (PSN)  
 24 are 79 (35) and 213 (261) degrees, respectively (Fig. 2).

1 To compare the reflectivity observed of targets at similar heights from both radars, the beam  
2 height was calculated assuming a standard atmospheric beam propagation (Rinehart, 2010), as  
3 follows:

$$4 \quad H = \sqrt{r^2 + (R' + H_0)^2 + 2r(R' + H_0)\sin\phi} - R', \quad (3)$$

5 where  $r$  is the slant range from the radar,  $\phi$  is the elevation angle of the radar beam,  $H_0$  is the  
6 height of the radar antenna above sea level, and  $R' = (4/3)R$ , where  $R$  is the Earth's radius  
7 (6,371 km). The radar antenna heights of PSN and BSL are 547 and 1085 m, respectively.  
8 Figure 3 shows the beam height of PSN with blue solid line and BSL at the equidistance line  
9 (blue dashed line as shown in Fig. 2). EL1 to EL6 show the elevation angles from smallest to  
10 largest. The smallest difference in beam height between the two radars is 149 m, which was  
11 obtained using the fourth elevation angle of PSN and the third elevation angle of BSL.  
12 Therefore, the reflectivity bias of PSN was calculated by averaging the difference of reflectivity  
13 along with the equidistance line observed from fourth elevation angle of PSN and third one of  
14 BSL.

15 In the second approach, the overlapping area for the two radars was calculated by matching the  
16 coordinates. The polar coordinate of two radars was converted to a Cartesian coordinate with a  
17 spatial resolution of 1 km. The overlapping area was then determined by considering the  
18 distances between the two radars in the east–west and north–south directions. Figure 4 shows a  
19 schematic diagram of the overlapping area for the two radars. The distance between two radars  
20 in east-west and north-south direction are 42 km and 64 km, respectively. The reflectivity  
21 observed from both radars at the pixels designated at the overlapping area as shown by blue  
22 rectangle in right panel of Fig. 4 were compared to calculate the  $Z_H$  bias of PSN. The extracted  
23 domain of PSN and BSL for the comparison is  $158 \times 136$  km.

24 The third and final approach is to use DSD observations from the PARSIVEL disdrometer. The  
25 reflectivity was calculated from the DSD measurements at 1 min resolution, and averaged over  
26 10 mins to match the radar time resolution. Figure 5 shows a schematic of the procedure used  
27 to match the radar and PARSIVEL data. The PARSIVEL disdrometer is located ~9 km from  
28 the radar, at an azimuthal angle of 87 degrees. The radar reflectivity was averaged over a  
29 domain of 13 gates  $\times$  3 degrees in azimuth, centered at the PARSIVEL location. The difference  
30 of reflectivity observed from PSN and PARSIVEL were calculated and was then taken as a  $Z_H$   
31 bias.

## 2.4 Validation

The normalized error (NE), root-mean-square error (RMSE), and correlation coefficient (CC) between rainfall estimates and measurements from 121 gauges were calculated to measure the performance of each bias correction method. The rain gauges were 0.5 mm tipping-bucket type. Time resolution of gages is 1 min and data quality control was done by KMA. These quantities are defined as follows:

$$NE = \frac{\frac{1}{N} \sum_{i=1}^N |R_{R,i} - R_{G,i}|}{\overline{R_G}} \quad (3)$$

$$RMSE = \left[ \frac{1}{N} \sum_{i=1}^N (R_{R,i} - R_{G,i})^2 \right]^{1/2} \quad (4)$$

$$CC = \frac{\sum_{i=1}^N (R_{R,i} - \overline{R_R})(R_{G,i} - \overline{R_G})}{\left[ \sum_{i=1}^N (R_{R,i} - \overline{R_R})^2 \right]^{1/2} \left[ \sum_{i=1}^N (R_{G,i} - \overline{R_G})^2 \right]^{1/2}}, \quad (5)$$

where N is the number of radar rainfall ( $R_R$ ) and gauge rainfall ( $R_G$ ) pairs, and  $\overline{R_R}$  and  $\overline{R_G}$  are the average hourly rain rates from radar and gauges, respectively. These quantities were calculated using total accumulated rainfall amounts for analyzed time period from radar and gauge measurements at each point. The radar rainfall value at each point was obtained by averaging rainfall over a small area ( $1 \text{ km} \times 1^\circ$ ) centered on the corresponding rain gauge. The radar rainfall was calculated using the relation  $Z = 200 R^{1.6}$  and  $Z = 300 R^{1.4}$ .

## 3 Results

The accuracy of rainfall estimation using corrected reflectivity was evaluated to measure the effectiveness of each method for calculating reflectivity bias. Two rainfall events were used, occurring on 25 August 2014 and 8 September 2012 (Table 1). The August and September events were caused by low pressure systems over southern and northern Korea, respectively.

Figure 6 shows the time series of  $Z_H$  observed from BSL radar on 8 September in 2012 and 25 August in 2014. The precipitation within radar coverage on 8 September in 2012 was occurred by low pressure with the front located at northern part of Korea. The core of the precipitation

1 systems was elongated from south to north and moved to eastward. The maximum reflectivity  
2 of the core was more than 45 dBZ and caused rainfall at the western part of radar center at 0300  
3 LST (Fig. 6(a)), became more organized shape at the eastern part of radar center at 0400 LST  
4 (Fig. 6(c)), and moved to eastward and located out of land at 0500 LST (Fig. 6(e)) on 8  
5 September in 2012. The precipitation system on 25 August in 2014 was caused by the low  
6 pressure located at southern part of Korea. The two strong rainfall within the radar coverage  
7 were located at south-western part of radar center with distance between 120 km and 150 km  
8 and southern part of radar center with distance between 30 km and 90 km, respectively at 1200  
9 LST on 25 August in 2014 (Fig. 6(b)). The two convective cells moved to eastward, their  
10 strength were intensified and the area of rainfall was wider at 1300 LST (Fig. 6(d)). The two  
11 systems moved to eastward continuously, were merged together at 1400 LST (Fig. 6(f)).

12 Figure 7 shows the time series of hourly rainfall and daily accumulation measured by a gage  
13 which recorded highest daily rainfall within radar coverage on 8 September in 2012 and 25  
14 August in 2014. The highest daily accumulated rainfall was recorded from North Changwon  
15 (ID 255) and Geumjeong (ID 939) on each day, respectively. The daily accumulation of ID 255  
16 was 150 mm, the maximum hourly rainfall was around 40 mm, and the duration of the rainfall  
17 was 7 hours (Fig. 7.(a)). The daily accumulation of ID 939 was around 270 mm, the maximum  
18 hourly rainfall was more than 100 mm h<sup>-1</sup>. The rainfall amount for 3 hours (1000 LST, 1400  
19 LST, and 1500 LST) were mainly contributed to the total rainfall accumulation on 25 August  
20 in 2014 (Fig. 7(b)).

### 21 **3.1 Equidistance line method**

22 Before estimating radar rainfall rates, reflectivity biases were calculated using each of the three  
23 methods. Figure 8 shows time series of the average reflectivity difference between PSN and  
24 BSL at the equidistance line and the number of samples used in each calculation, on 25 August  
25 2014. The average difference over the entire time period was -7.85 dB, and the largest  
26 difference was -12.46 dB. The number of samples used for each calculation was determined  
27 using a beam height difference threshold of 0.1 km. The number of samples was generally  
28 above 60, but it was smaller than 60 after 1450 LST. Figure 9 shows the same information for  
29 8 September 2012. The average reflectivity difference over the entire time period was -2.56  
30 dB, and the largest difference was -6.77 dB. The number of samples was less than 50 until 0310  
31 LST, after which it increased to more than 50. This result suggests that the precipitation system



1 observed from both BSL and PSN radar was not located enough over the equidistance line to  
2 get a reliable comparison until 0310 LST.

3 Figure 10 shows the scatter plot of total accumulated radar rainfall amount for analyzed time  
4 period, calculated using  $Z = 200 R^{1.6}$  and  $Z=300R^{1.4}$  and gauge rainfall, for 25 August 2014 and  
5 8 September 2012. The RMSE, NE, and CC of rainfall pairs for  $Z = 200 R^{1.6}$  ( $Z=300R^{1.4}$ ) on  
6 25 August 2014 were improved from 65.7 (66.1) to 32.6 (27.0) mm, from 0.79 (0.81) to 0.36  
7 (0.31), and from 0.88 (0.87) to 0.89 (0.88), respectively. On 8 September 2012, the RMSE, NE,  
8 and CC for  $Z = 200 R^{1.6}$  ( $Z=300R^{1.4}$ ) changed from 30.0 (28.5) to 22.5 (20.0) mm, from 0.58  
9 (0.56) to 0.41 (0.36), and from 0.81 (0.8) to 0.78 (0.76), respectively, by the use of bias  
10 correction. In both cases, the use of corrected reflectivity for rainfall estimation resulted in much  
11 better accuracy than did using raw reflectivity.

### 12 **3.2 Overlapping area method**

13 Figure 11 shows time series of the mean reflectivity differences between PSN and BSL in the  
14 overlapping area, and the number of samples used for calculation of  $Z_H$  bias on 25 August 2014.  
15 Bias values ranged from  $-11.7$  to  $-8.3$  dB over the period analyzed. The bias was stable until  
16 1440 LST, after which it fluctuated as the number of samples decreased. Figure 12 shows the  
17 same information for 8 September 2012. Bias values ranged from  $-4.66$  to  $0.22$  dB, and lower  
18 bias values were occurred from 0300 LST to 0400 LST. The fluctuation also would be caused  
19 by the sudden change of microphysical characteristics of rainfall pass through the overlapping  
20 area for both radars. It would reduce the accuracy of  $Z_H$  of BSL corrected by self-consistency.  
21 The radar rainfall estimation was done by using observed and corrected  $Z_H$  as an input of Z-R  
22 relations.

23 Figure 13 shows a scatter plot of total accumulated radar rainfall amount for entire analyzed  
24 time period, calculated using  $Z = 200 R^{1.6}$  and  $Z=300R^{1.4}$  and gauge rainfall, for 25 August  
25 2014 and 8 September 2012. The RMSE and NE of rainfall pairs for  $Z = 200 R^{1.6}$  ( $Z=300R^{1.4}$ )  
26 on 25 August 2014 were improved from 65.7 (66.1) to 29.7 (25.8) mm and from 0.79 (0.81) to  
27 0.31 (0.28), respectively. On 8 September 2012, RMSE and NE for  $Z = 200 R^{1.6}$  ( $Z=300R^{1.4}$ )  
28 were improved from 30.0 (28.5) to 21.8 (19.1) mm and from 0.58 (0.56) to 0.40 (0.34),  
29 respectively, by the use of bias correction, while CC for  $Z=200R^{1.6}$  was unchanged at 0.81 and  
30 that of  $Z=300R^{1.4}$  were changed 0.8 to 0.79. Again, in both cases the use of corrected reflectivity  
31 for rainfall estimation was found to improve the accuracy compared with raw reflectivity.

### 1 3.3 Disdrometer method

2 Before using the disdrometer bias correction method to estimate rainfall rates, 10 min rain rates  
3 obtained directly from DSDs and from collocated gauges were compared. Figure 14 shows the  
4 time series of rain rate obtained by PARSIVEL and collocated gauges on 25 August 2014. Daily  
5 total rainfall amounts for PARSIVEL and the gauges were 129.4 and 116.0 mm, respectively.  
6 The difference in the totals is only 13.4 mm, and the RMSE and CC between the 10 min time  
7 series were  $0.52 \text{ mm h}^{-1}$  and 0.99, respectively. On 8 September 2012 (not shown), the  
8 difference between the total daily rainfall amounts was 0.7 mm and the RMSE and CC between  
9 the two 10 min series were  $0.62 \text{ mm h}^{-1}$  and 0.96, respectively. It is concluded that DSDs were  
10 sufficiently reliable to use as a reference with which to calculate the radar bias.

11 Figure 15 shows time series of reflectivity obtained by radar and by PARSIVEL, and the radar  
12 bias, on 25 August 2014. The bias was more stable before 1200 LST than after 1400 LST.  
13 PARSIVEL reflectivity fell to zero from 1230 to 1340 LST because the precipitation system  
14 moved away from the PARSIVEL site. Because of this discontinuity, the bias can be considered  
15 to be reliable only until 1200 LST. The bias values ranged from -13.4 to -3.1 dB until 1200  
16 LST. Figure 16 shows time series of reflectivity obtained by radar and by PARSIVEL, and the  
17 radar bias, on 8 September 2012. On this occasion there was no reflectivity data from either  
18 PARSIVEL or radar until 0330 LST. The bias values were distributed from -14.3 to 12.7dB.

19 Figure 17 shows a scatter plot of total accumulated radar rainfall amount for the entire time  
20 period, calculated using  $Z = 200 R^{1.6}$  and  $Z=300R^{1.4}$  and gauge rainfall, on 25 August 2014 and  
21 8 September 2012. The RMSE and NE of rainfall pairs for  $Z = 200 R^{1.6}$  ( $Z=300R^{1.4}$ ) on 25  
22 August 2014 were improved from 65.7 (66.1) mm to 42.0 (61.4) mm and from 0.79 (0.81) to  
23 0.40 (0.53), respectively. On 8 September 2012, RMSE and NE for  $Z = 200 R^{1.6}$  ( $Z=300R^{1.4}$ )  
24 decreased from 30.1 (28.6) to 24.6 (23.9) mm, and from 0.58 (0.56) to 0.46 (0.44), respectively,  
25 while CC for  $Z = 200 R^{1.6}$  ( $Z=300R^{1.4}$ ) decreased from 0.81 (0.8) to 0.65 (0.59). In both cases,  
26 using corrected rather than raw reflectivity for rainfall estimation improved accuracy as  
27 measured by RMSE and NE, but reduced accuracy as measured by CC.

### 28 3.4 Discussion

29 Figure 18 shows RMSE of total rainfall amount for entire time period obtained by gage and  
30  $Z=200R^{1.6}$  from each of the different bias correction methods on 25 August 2014 and 8  
31 September 2012. Red, black, green, and blue bars show the RMSE obtained using the

1 uncorrected, equidistance line, overlapping area, and disdrometer methods, respectively. The  
2 disdrometer method produced the lowest RMSE before 1200 LST and the highest RMSE after  
3 1200 LST (Fig. 18(a)). This behavior can be attributed to the varying stability of the reflectivity  
4 calculated by PARSIVEL (Fig. 15). The overlapping method is more accurate than the  
5 equidistance line method for the entire time period, except at 1400 LST. All the bias correction  
6 methods performed better than the uncorrected method, except for the period during which  
7 DSDs were unavailable. On 8 September 2012, the RMSE of the overlapping area method was  
8 lower than that of the other methods for the entire period, except at 0500 and 0600 LST (Fig.  
9 18(b)). The disdrometer method produced lower RMSE at 0600 LST, when DSDs were  
10 available, and the equidistance line method was more accurate at 0500 LST, when the sample  
11 number was high (Fig. 15). Comparing the RMSE between two events, the large fluctuation  
12 was occurred. It would be caused by the difference of total rainfall amount between two rainfall  
13 systems. The maximum total rainfall amount for both cases were around 250 mm for 25 August  
14 and 150 mm for 8 September 2012. Another reason of the fluctuation would be the difference  
15 of radar hardware calibration error for PSN between two events.

16 Considering the entire period covering both events, the overlapping area method showed the  
17 best performance, as measured by RMSE. The accuracy of radar rainfall estimates could be  
18 improved by combining the three approaches, using metrics such as DSD temporal stability and  
19 the number of samples available for the equidistance line method to select the best method for  
20 a particular situation.

21

## 22 **4 Conclusions**

23 Three methods for determining the reflectivity bias of single polarization radar using dual  
24 polarization radar reflectivity and disdrometer data were proposed and examined for two  
25 rainfall events caused by low pressure over the Korean Peninsula on 25 August 2014 and 8  
26 September 2012. Single polarization radar reflectivity was underestimated by more than 12 dB  
27 and 7 dB during the August and September events, respectively. All three methods improved  
28 the accuracy of estimated rainfall, except during a period when DSDs were not observed (as  
29 the precipitation system did not pass over the disdrometer location). The use of these bias  
30 correction methods reduced rainfall RMSE by up to 50%. Overall, the accuracy of rainfall  
31 estimation was highest when the overlapping area method was used to correct radar reflectivity.

1 The reflectivity biases obtained using the disdrometer and equidistance line methods were more  
2 temporally variable than those obtained using the overlapping area method. There were several  
3 hours during which the disdrometer method was more accurate than the overlapping area  
4 method. We suggest that combining the overlapping area method with the disdrometer method,  
5 using threshold criteria such as the temporal stability of reflectivity and the number of samples  
6 available would allow more accurate estimates of rainfall. However, optimum values for the  
7 domain size for the overlapping area method, the sample number threshold for the equidistance  
8 line method, and the reflectivity threshold for the disdrometer method should be determined in  
9 order to combine the three methods most effectively.

10

### 11 **Acknowledgements**

12 The authors thank the Ministry of Land, Infrastructure, and Transport of the Korean government  
13 and the Korean Meteorological Administration for providing radar data and AWS (Automatic  
14 Weather System) gauge data. This research was funded by the Korea Meteorological Industry  
15 Promotion Agency under Grant KMIPA 2015-1050. And this research was partly funded by  
16 the Korea Meteorological Industry Promotion Agency under Grant KMIPA 2015-1060

17

## 1 **References**

- 2 Austin, P. M.: Relation between measure radar reflectivity and surface rainfall, Monthly  
3 Weather Review, 115, 1053-1070, 1987.
- 4 Battan, L. J.: Radar Observations of the Atmosphere, The University of Chicago Press, Chicago  
5 and London, 324, 1973.
- 6 Campos, E. and Zawadzki, I.: “Instrumental uncertainties in Z-R relations”, Journal of Applied  
7 Meteorology, 36, 1088-1102, 2000.
- 8 Gorgucci E., Scarchilli G., and Chandrasekar V.: Calibration of radars using polarimetric  
9 techniques. IEEE Transactions on Geoscience and Remote Sensing, 30: 853-858, 1992.
- 10 Gorgucci, E., Scarchilli, G., and Chandrasekar, V.: A procedure to calibrate multiparameter  
11 weather radar using properties of the rain medium. IEEE Transactions on Geoscience and  
12 Remote Sensing, 37: 269–276, 1999.
- 13 Goddard J, Tan J, and Thurai M.: Technique for calibration of meteorological radars using  
14 differential phase. Electronic Letters, 30: 166 – 167, 1994.
- 15 Gourley J, Illingworth A, Tabary P.: Absolute calibration of radar reflectivity using redundancy  
16 of the polarization observations and implied constraints on drop shapes. Journal of Atmospheric  
17 and Oceanic Technology, 26: 689-703, 2009.
- 18 Jang, M., Lee, D., and You, C.: Z-R relationship and DSD analyses using a POSS disdrometer.  
19 Part I: Precipitation cases in Busan, Journal of the Korean Meteorological Society, 40, 557-570,  
20 2004.
- 21 Loffler-Mang, M. and Joss, J.: An optical disdrometer for measuring size and velocity of  
22 hydrometeors, J. Atmos. Oceanic. Technol., 17, 130-139, 2000.
- 23 Marks, D. A., Wolff, D. B., Carey, L. D., and Tokay, A.: Quality control and calibration of the  
24 dual-polarization radar at Kwajalein, RMI. Journal of Atmospheric and Oceanic Technology,  
25 28: 181–196, 2011.
- 26 Rinehart, R. E.: Radar for meteorologists, fifth edition, Rinehart Publications, Nevada, United  
27 States, pp. 482, 2010.

1 Ryzhkov, A. V., Giangrande, S. E., Melnikov, V. M., and Schuur, T. J.: Calibration issues of  
2 dual-polarization radar measurements. *Journal of Atmospheric and Oceanic Technology*, 22:  
3 1138–1155, 2005.

4 Scarchilli G., Gorgucci E., Chandrasekar V., and Dobaie A.: Self-consistency of polarization  
5 diversity measurement of rainfall. *IEEE Transactions on Geoscience and Remote Sensing*, 34:  
6 22–26, 1996.

7 Trabal J. M., Chandrasekar V., Gorgucci, E. and McLaughlin D. J.: Differential reflectivity  
8 (ZDR) calibration for CASA radar network using properties of the observed medium,  
9 *Geoscience and Remote Sensing Symposium, 2009 IEEE International, IGARSS 2009*  
10 (Volume:2) II-960-II963, 2009.

11 Vivekanandan J., Zrnicek D. S., Ellis S. M., Oye R., Ryzhkov A. V., and Straka J.: Cloud  
12 microphysics retrieval using S-band dual-polarization radar measurements. *Bulletin of the*  
13 *American Meteorological Society*, 80(3): 381-388, 1999.

14 Vivekanandan, J. Zhang G, Ellis S., Rajopadhyaya D., Avery S.: Radar reflectivity calibration  
15 using differential propagation phase measurement. *Radio Science*, 38, No 3, MAR 14-1-14,  
16 2003.

17 Wilson, J. W. and Brandes, E. A.: Radar measurement of rainfall-A summary, *Bulletin of the*  
18 *American Meteorological Society*, 60, 1048-1058, 1979.

19 You, C., Lee, D., Jang, M., Seo, K., Kim, K., and Kim, B.: The characteristics of rain drop size  
20 distributions using a POSS in Busan area, *Journal of the Korean Meteorological Society*, 40,  
21 713-724, 2004.

22 You, C., Lee, D., Jang, M., Uyeda, H., Shinoda, T., and Kobayashi, F.: Characteristics of  
23 rainfall systems accompanied with Changma front at Chujado in Korea, *Asia-Pacific Journal*  
24 *of Atmospheric Sciences*, 46, 41-51, 2010.

25 You, C.-H., Lee, D.-I., and Kang, M.-Y.: Rainfall estimation using specific differential phase  
26 for the first operational polarimetric radar in Korea, *Advances in Meteorology*, vol. 2014,  
27 Article ID 41317, 10 pages, doi:10.1155/2014/41317, 2014.

28 You, C.-H. and Lee, D.-I.: Decadal variation in raindrop size distributions in Busan, Korea,  
29 *Advances in Meteorology*, vol. 2015, Article ID 329327, 8 pages, 2015,  
30 doi:10.1155/2015/329327, 2015.

1 Zhang, J., Wang S., Clarke B.: WSR-88D reflectivity quality control using horizontal and  
2 vertical reflectivity structure. Preprints, 11<sup>th</sup> Conf. on Aviation, Range and Aerospace  
3 Meteorology, Hyannis, MA, Amer. Meteor. Soc, CD-ROM, P5.4, 2004

4

5

1 Table 1. Rainfall events used for the analysis.

| Date             | Source       | Period of analysis   |
|------------------|--------------|----------------------|
| 8 September 2012 | Low pressure | 0000 LST to 0600 LST |
| 25 August 2014   | Low pressure | 0900 LST to 1600 LST |

2

3



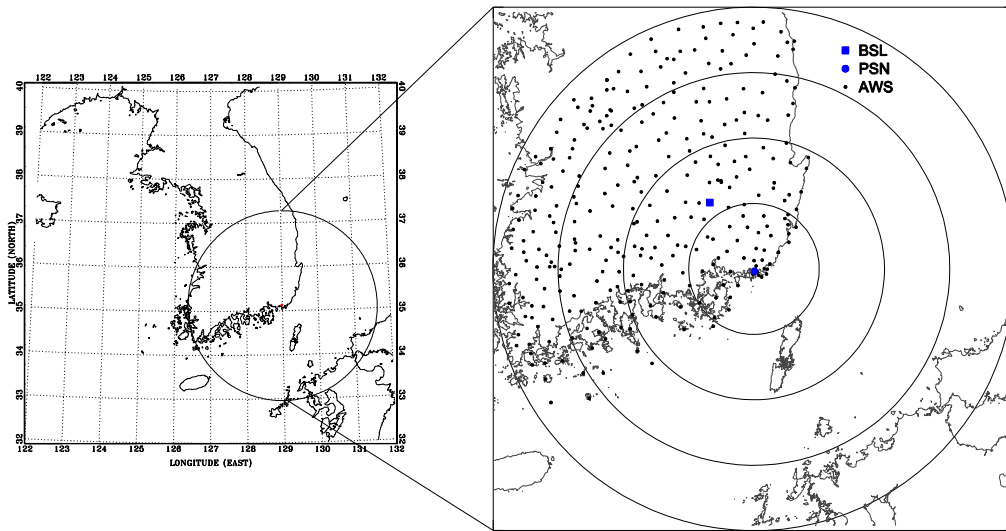

1

2 Figure 1. Location of the Bisland radar (solid rectangle), the PARSIVEL disdrometer and  
 3 Gudeok radar (solid circle), and rain gauges (black dots) distributed within 240 km of radar  
 4 coverage. Circles indicate distance from the Gudeok radar, and are drawn at intervals of 60 km.

5

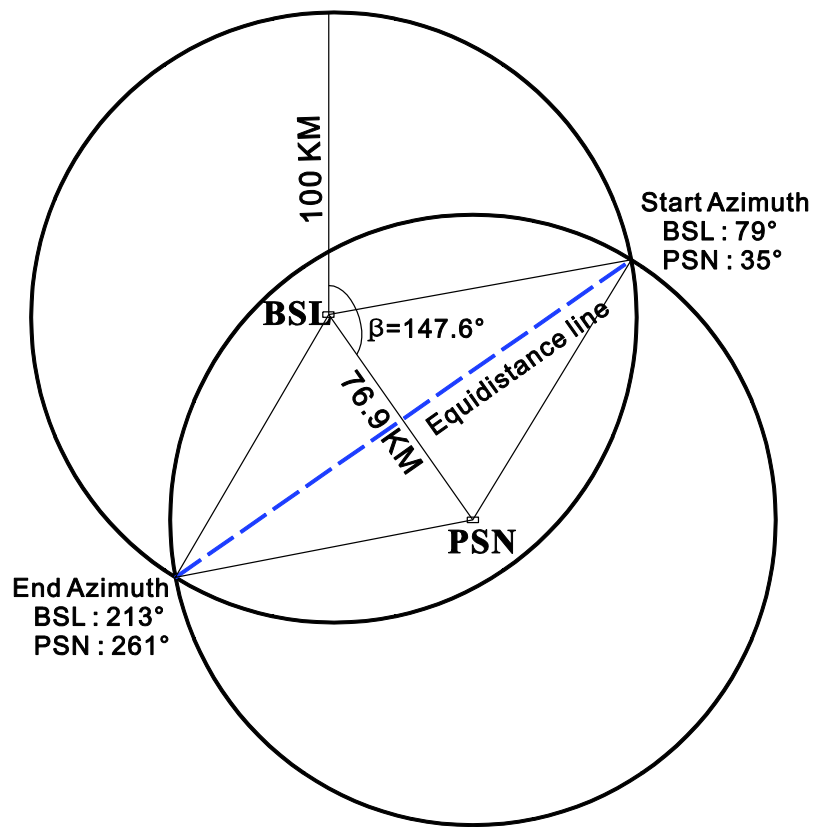

1

2 Figure 2. Schematic diagram showing the method used to calculate the line of equidistance  
 3 between two radars. The effective radius was set to 100 km and the distance between radars is  
 4 76.9 km. The azimuthal angle from BSL to PSN is 147.6 degrees. The start and end azimuthal  
 5 angles are 79 (35) and 213 (261) degrees for BSL (PSN), respectively. The blue dashed line  
 6 shows the equidistance line.

7

8

9

10

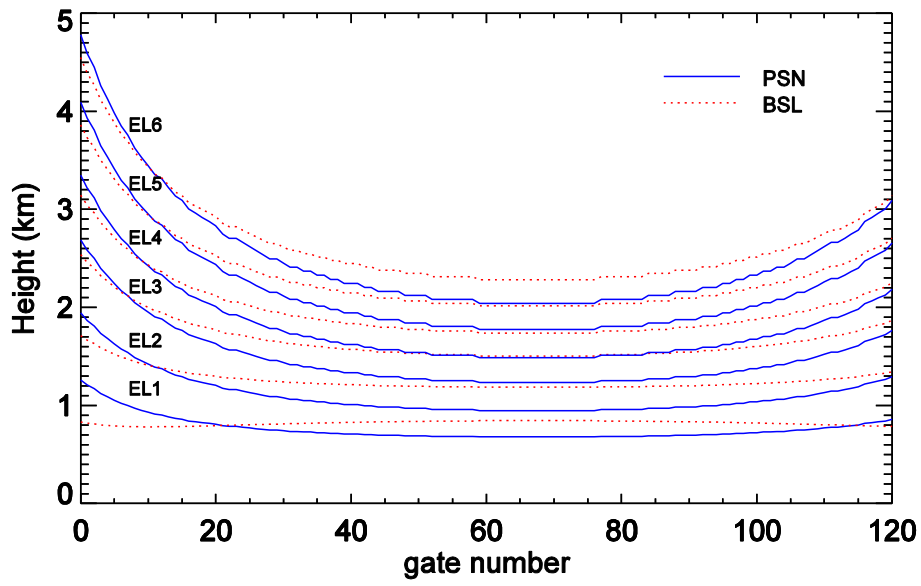

1  
2  
3  
4  
5

Figure 3. Beam height of PSN (blue solid lines) and BSL (red dotted lines) at the equidistance line. EL1 to EL6 show the lowest, second, third, fourth, fifth, and sixth elevation angles, respectively.

1

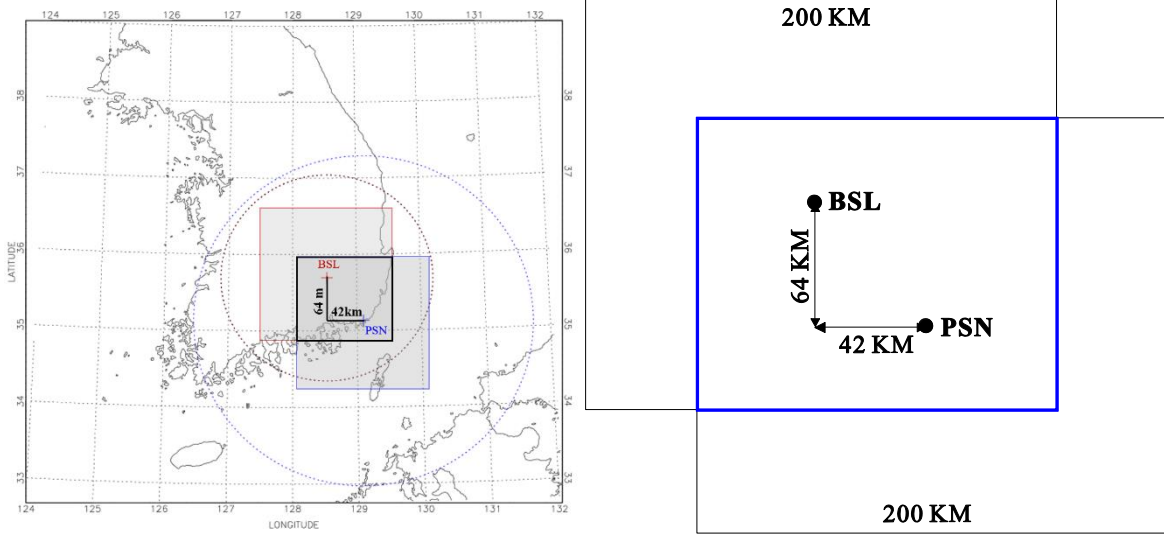

2

3 Figure 4. Schematic diagram of the overlapping area for BSL and PSN. The east–west and  
4 north–south distances between the two radars are 42 km and 64 km, respectively.

5

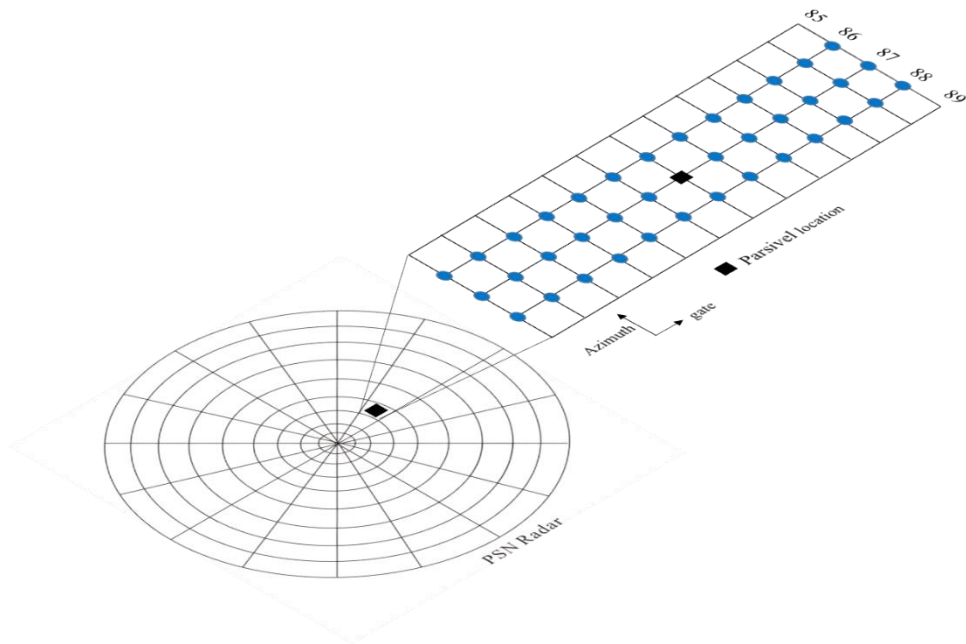

1

2 Figure 5. Schematic diagram showing matching of the radar gate and the PARSIVEL  
 3 disdrometer. PARSIVEL is located ~9 km from the radar, at an azimuthal angle of 87 degrees.

4 The radar reflectivity was averaged over a  $3 \text{ km} \times 3^\circ$  domain centered at the PARSIVEL  
 5 location.

6

7

8

9

10

11

12

13

14

15

16

17

1

(a)

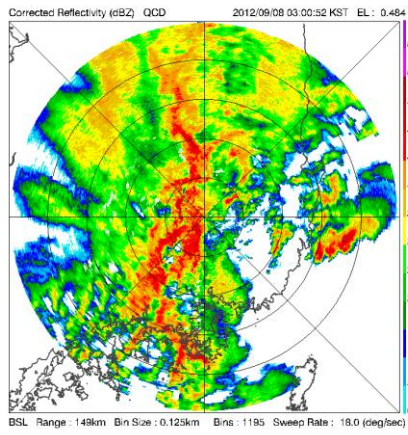

2

(b)

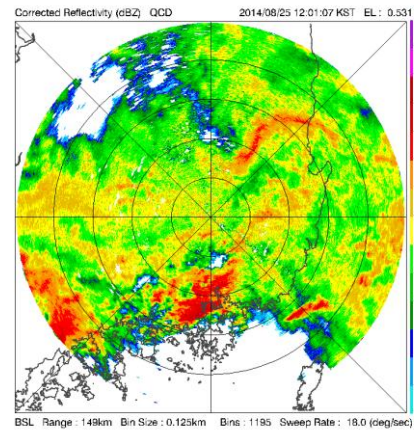

3

(c)

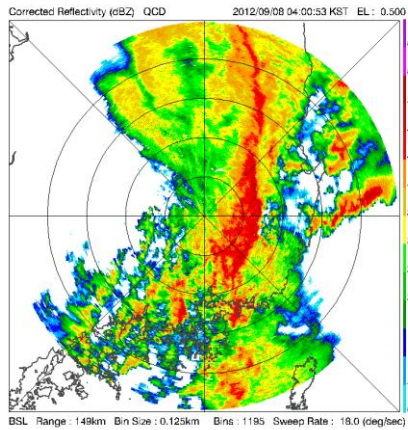

4

(d)

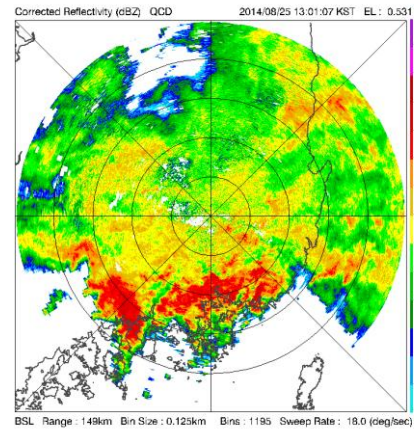

5

(e)

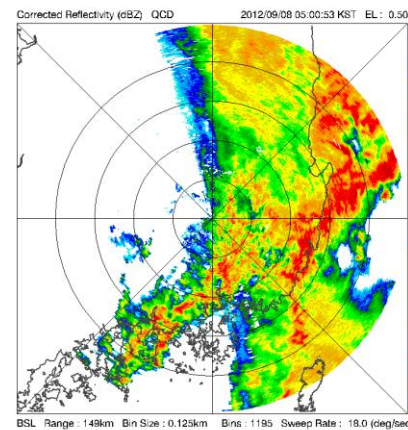

6

(f)

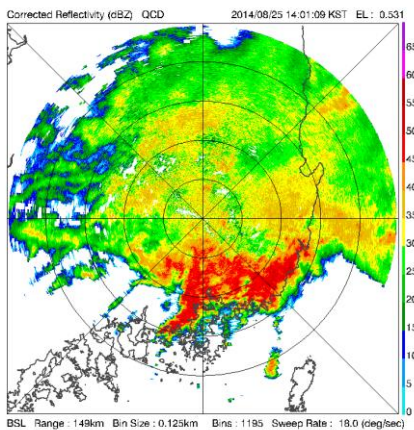

7 Figure 6. Time series of horizontal reflectivity (ZH) at 0.5 elevation angle observed from BSL  
 8 (a) 0400 LT, (c) 0500 LT, (e) 0600 LT on 8 September in 2012, (b) 1200 LT, (d) 1300 LT, (f)  
 9 1400 LT on 25 August in 2014.

1

(a)

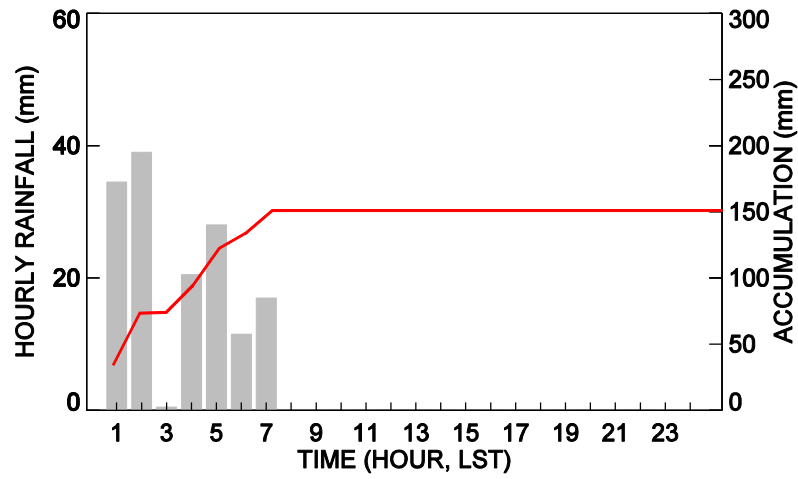

2

3

(b)

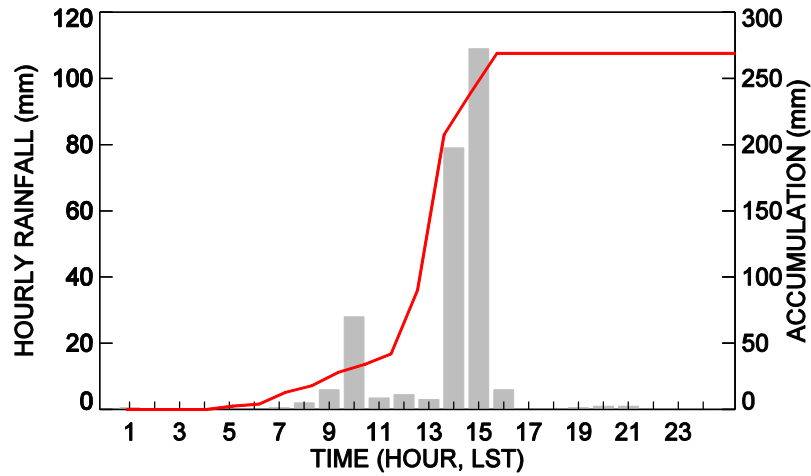

4

5 Figure 7. Time series of 1 hour rainfall (bar) and daily accumulated (red line) measured from a

6 gage which recorded highest daily rainfall within radar coverage at (a) North Changwon (ID

7 255) on 8 September in 2012 and (b) Geumjeong (ID 939) on 25 August in 2014.

8

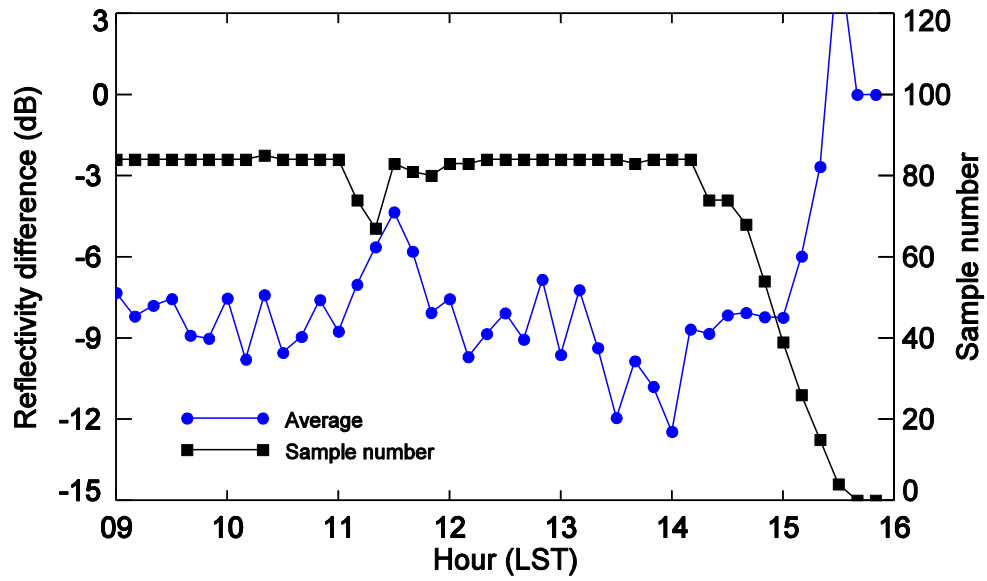

1

2 Figure 8. Time series of the average reflectivity difference between PSN and BSL at the  
 3 equidistance line (blue circles) and the number of samples used in each calculation (black  
 4 squares) on 25 August in 2014.

5



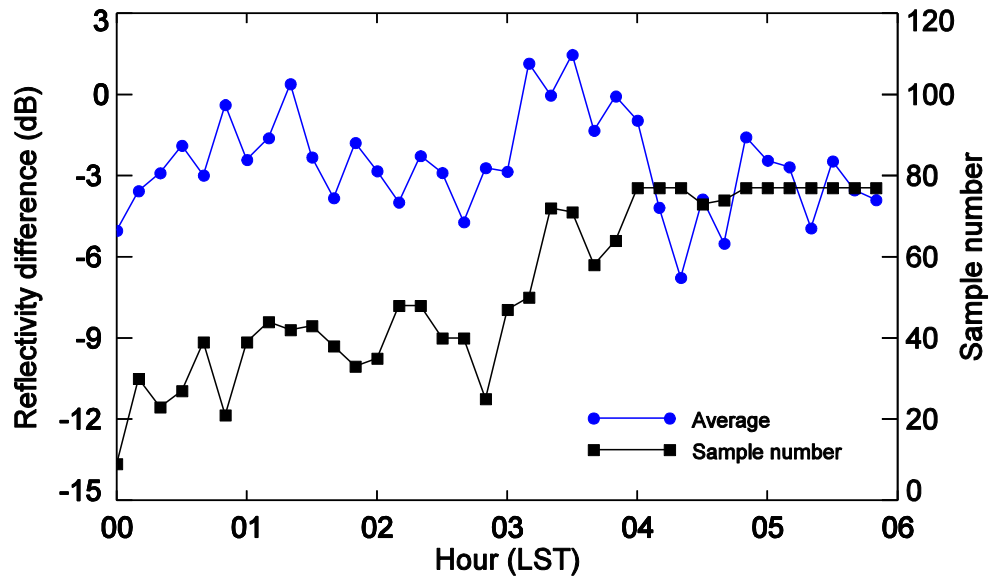

1

2 Figure 9. As for Fig. 8 but for 8 September 2012.

3

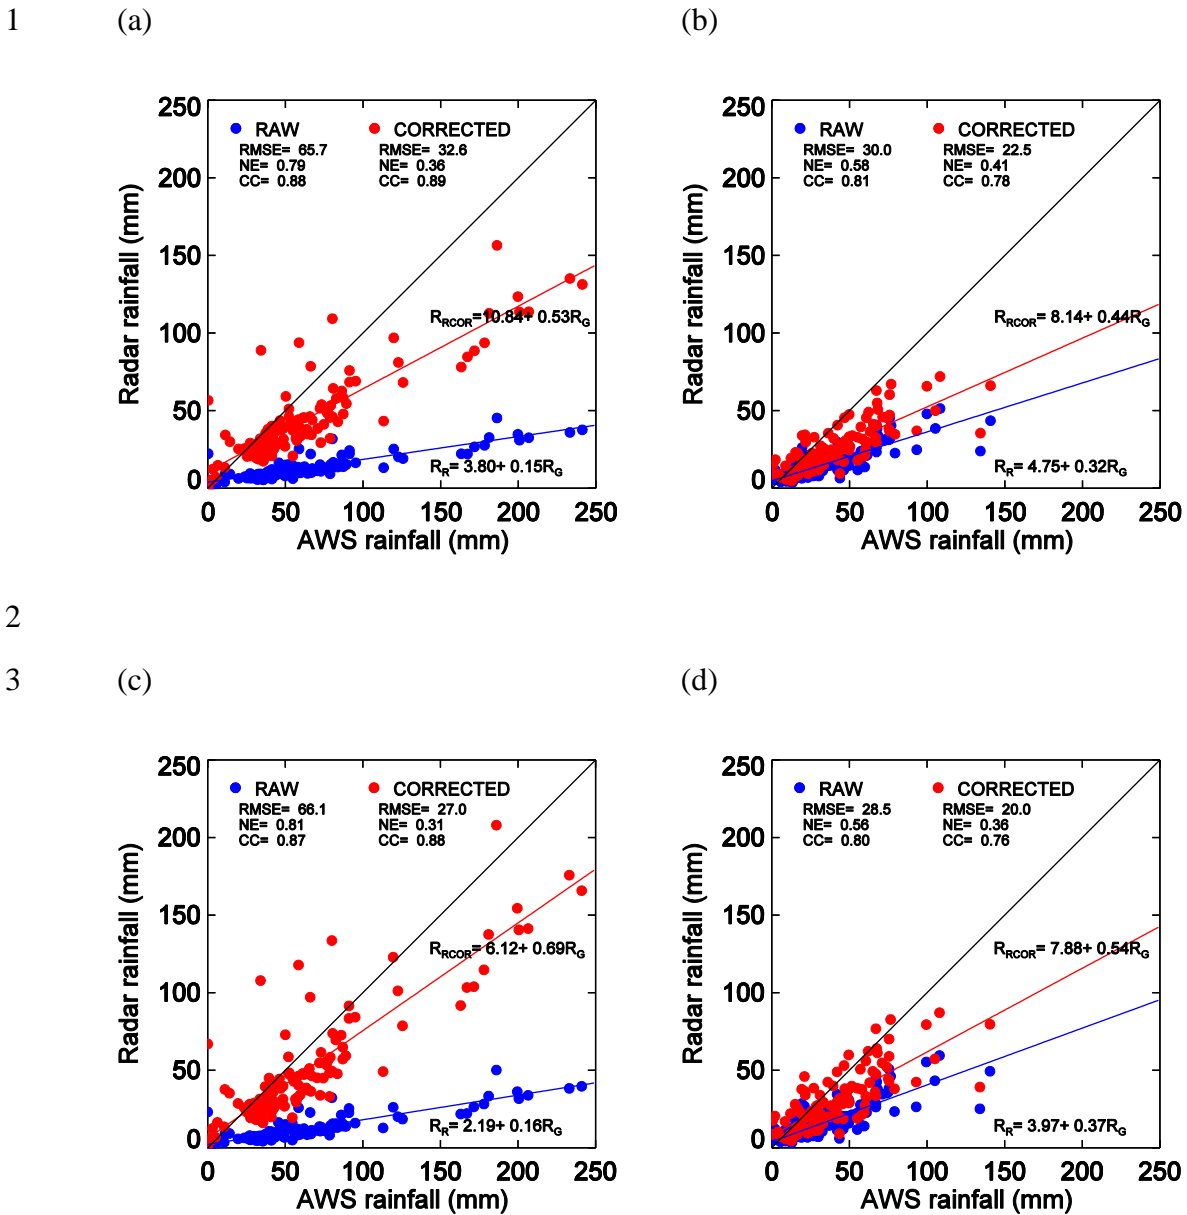

Figure 10. Scatter plot of total accumulated rainfall for analyzed time period calculated by gage and radar using (a and b)  $Z = 200 R^{1.6}$  and (c and d)  $Z = 300 R^{1.4}$  for 25 August 2014 and 8 September 2012, respectively. Blue circles show the rainfall pairs obtained using raw reflectivity and red circles show those obtained using reflectivity corrected with the equidistance line method.

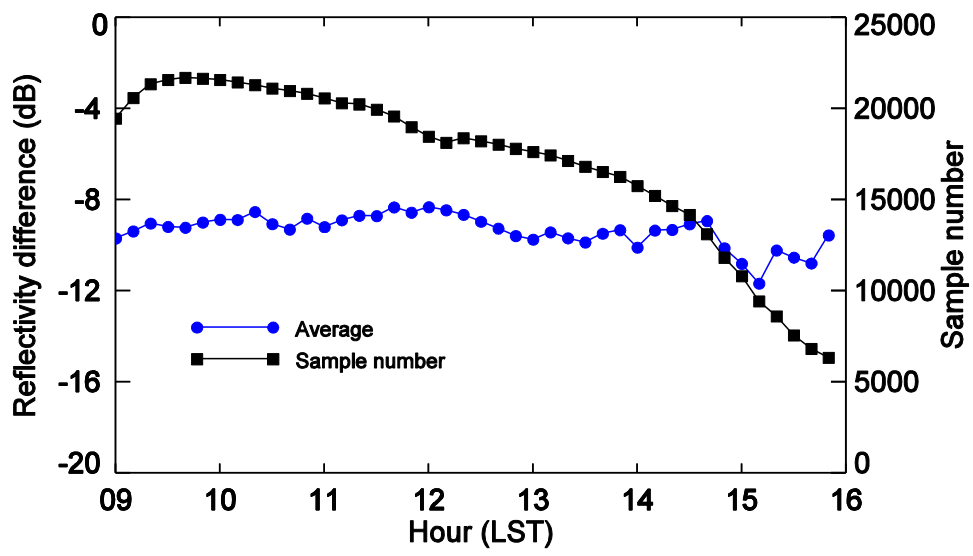

1

2 Figure 11. As for Fig. 8 but for the overlapping area method.

3

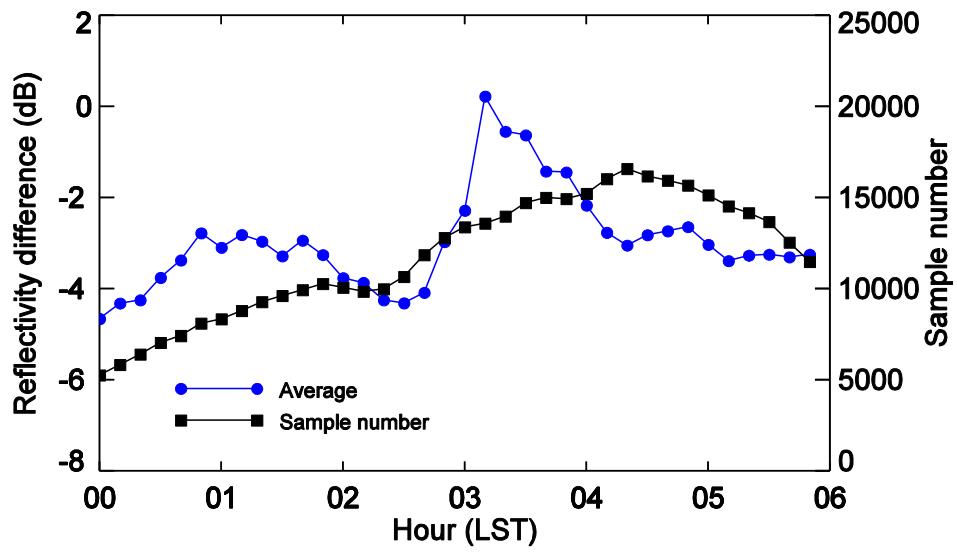

1

2 Figure 12. As for Fig. 9 but for the overlapping area method.

3

1

(a)

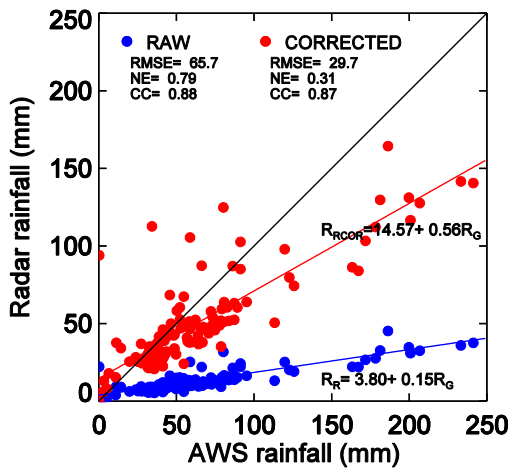

(b)

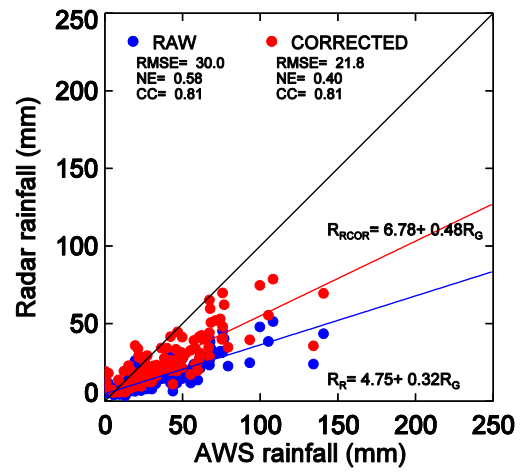

2

3

(c)

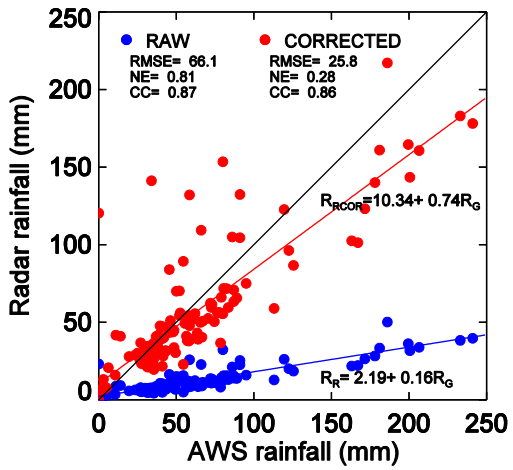

(d)

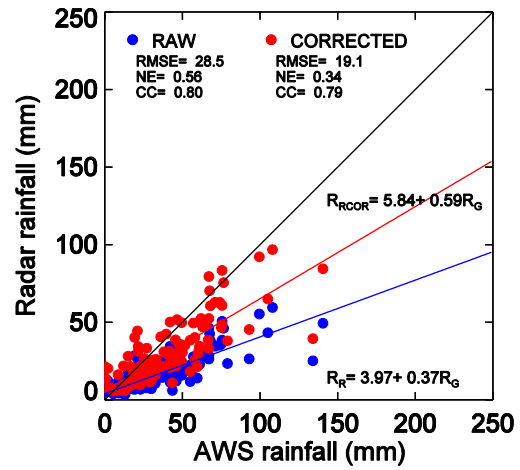

4

5 Figure 13. As for Fig. 10 but for the overlapping area method.

6

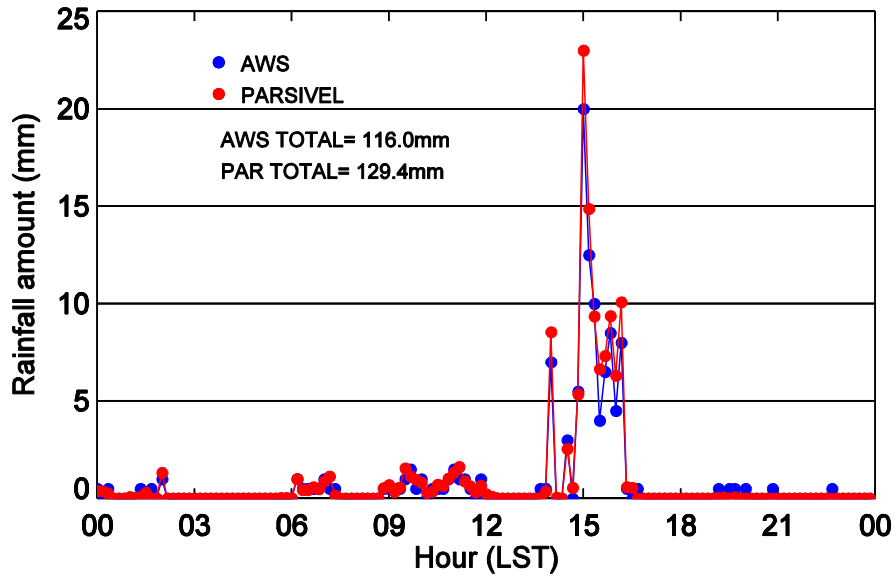

1

2 Figure 14. Time series of 10 min rainfall amount as obtained by PARSIVEL (red circles) and  
 3 collocated gauges (blue circles).

4

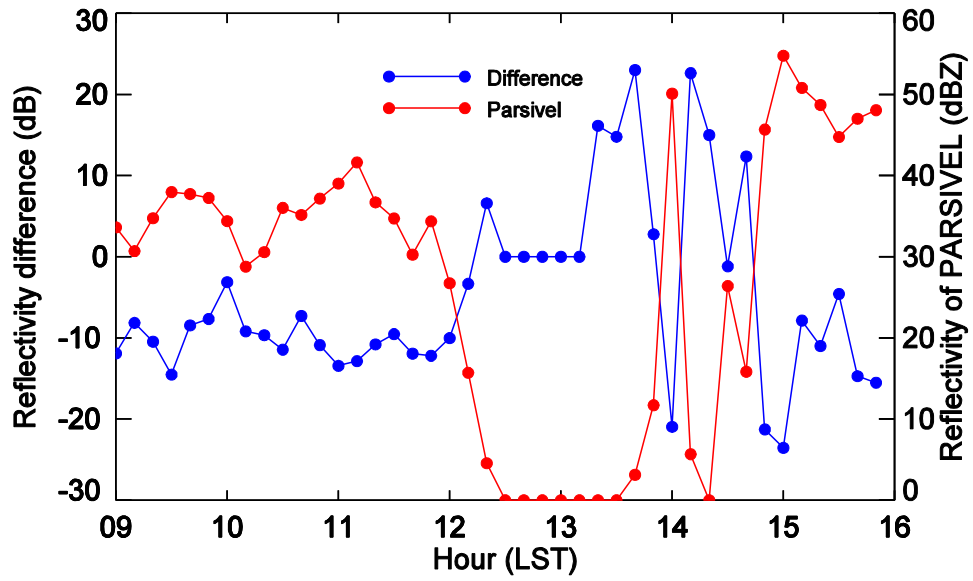

1

2 Figure 15. Time series of reflectivity obtained by PARSIVEL (red circles), and the radar bias  
 3 (blue circles) on 25 August 2014.

4

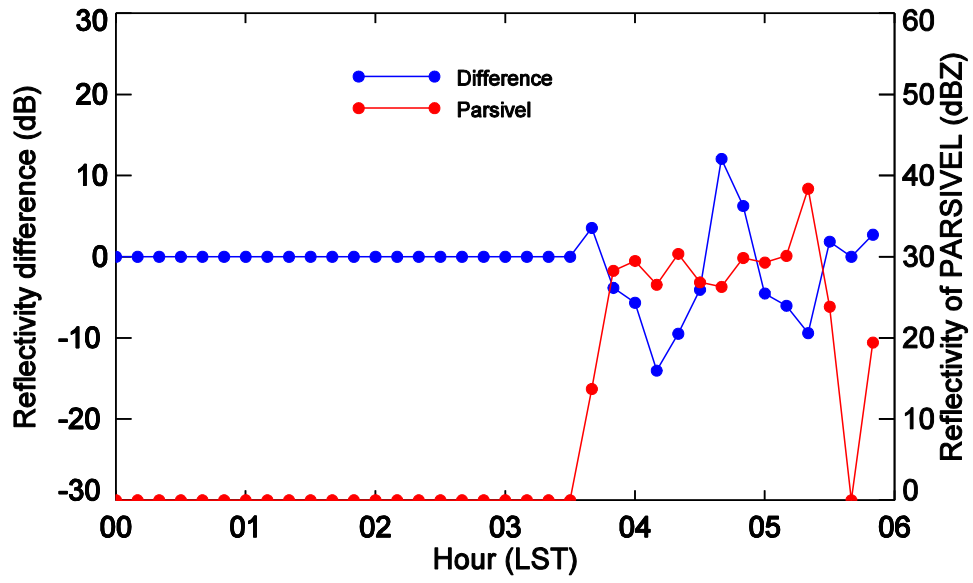

1

2 Figure 16. As for Fig. 15 but for 8 September 2012.

3



1

(a)

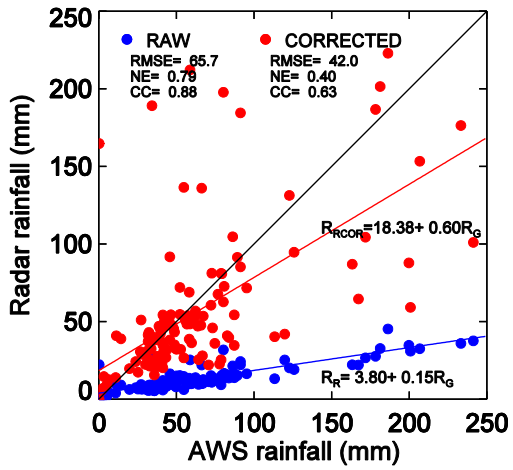

(b)

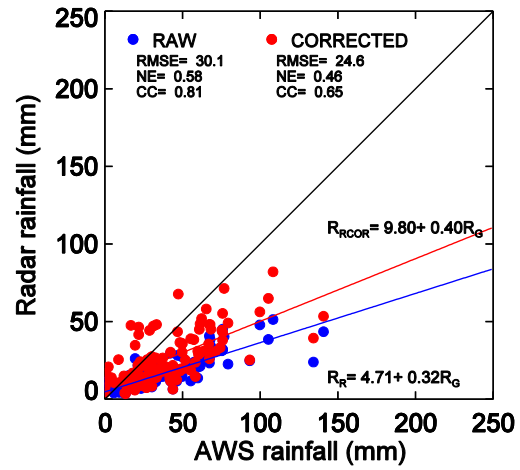

2

3

(c)

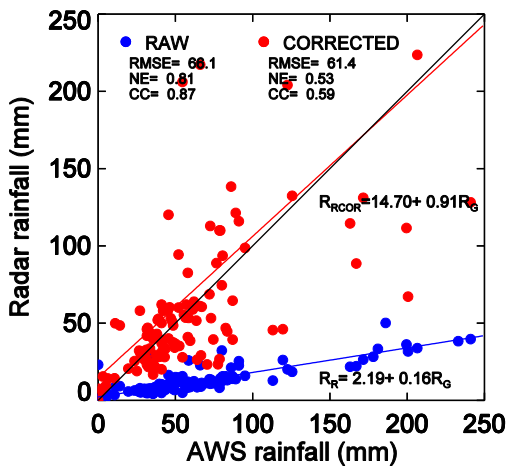

(d)

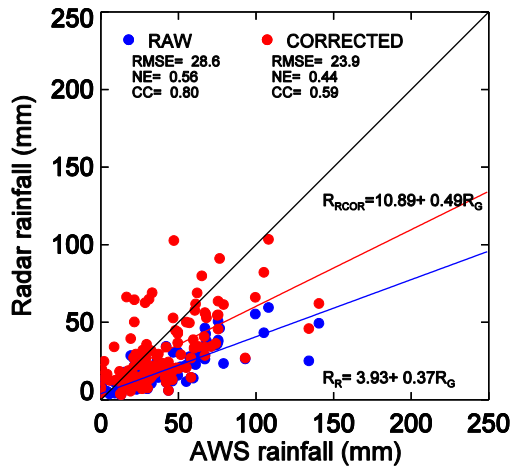

4

5 Figure 17. As for Fig. 10 but for the disdrometer method.

6

1

(a)

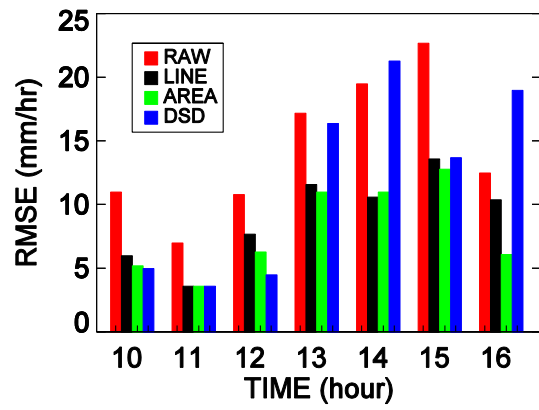

(b)

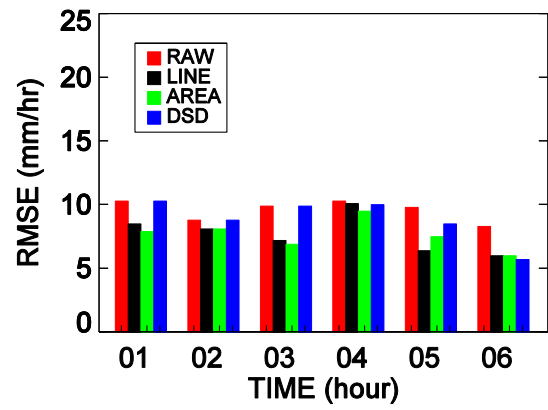

2

3 Figure 18. Accumulated rainfall RMSE calculated from radar and gage for different bias  
4 correction methods on (a) 25 August 2014 and (b) 8 September 2012. The bars with different  
5 colors show results obtained using the raw data, equidistance line method, overlapping area  
6 method, and disdrometer method, respectively.

7
